# Supplementary material for: Magnetic γ-Fe2O3@REVO4 (RE = Sm, Dy, Ho) affinity microspheres for selective capture, fast separation and easy identification of phosphopeptides
Source: Royal Society of Chemistry journal article supplement (doi:10.1039/c2tb00431c), 2013-01-01
Supplement: c2tb00431c.pdf [file c2tb00431c.pdf]

## Supporting Information

### Magnetic $\gamma\text{-Fe}_2\text{O}_3@REVO_4$ (RE=Sm, Dy, Ho) Affinity Microspheres for Selective Capture, Fast Separation and Easy Identification of Phosphopeptides

5  
Zhi-Gang Wang, Gong Cheng, Yan-Lin Liu, Ji-Lin Zhang\*, De-Hui Sun, and Jia-Zuan Ni

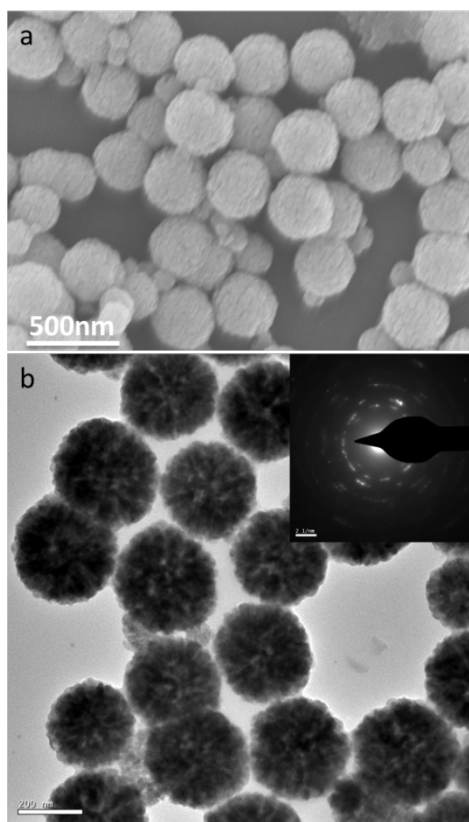

10  
**Fig. S1** SEM (a) and TEM (b) images of the  $\text{Fe}_3\text{O}_4$  particles. Inset is the Selected Area Electron Diffraction (SAED) pattern.

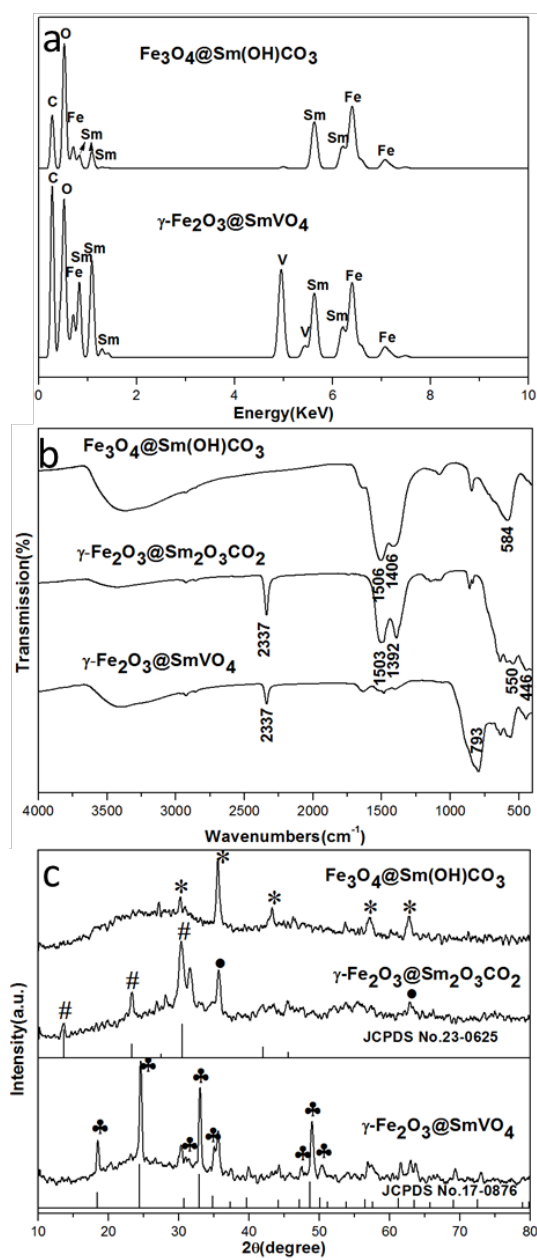

**Fig. S2** EDS spectra (a), XRD patterns (b), and FTIR spectra (c) of the  $\text{Fe}_3\text{O}_4@\text{Sm}(\text{OH})\text{CO}_3$ ,  $\gamma\text{-Fe}_2\text{O}_3@\text{Sm}_2\text{O}_3\text{CO}_2$  and  $\gamma\text{-Fe}_2\text{O}_3@\text{SmVO}_4$  samples.

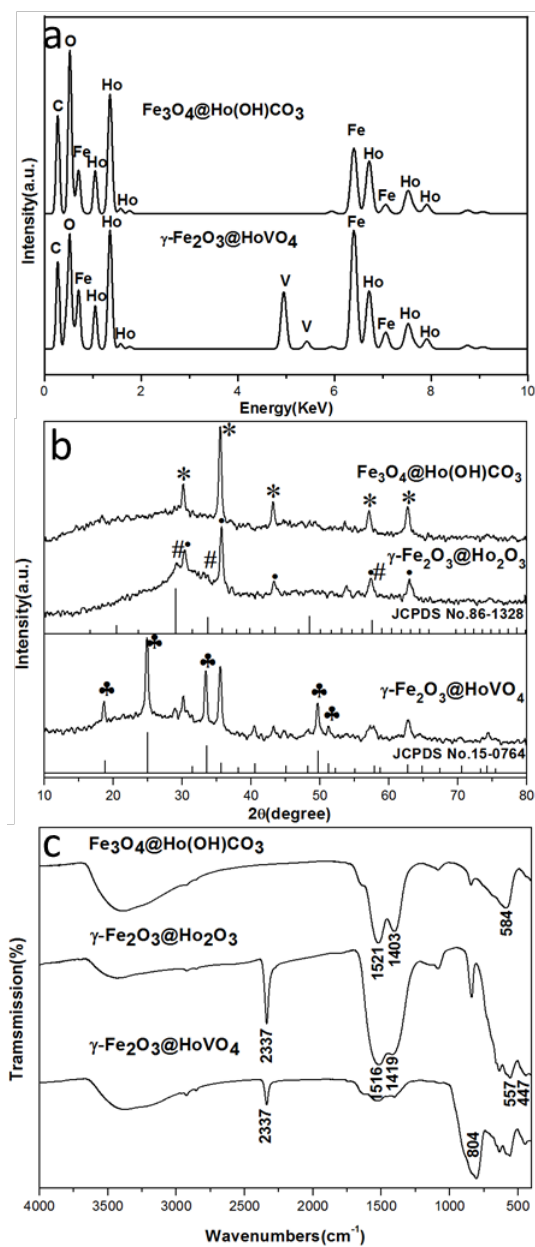

**Fig. S3** EDS spectra (a), XRD patterns (b), and FTIR spectra (c) of the  $\text{Fe}_3\text{O}_4@\text{Dy(OH)CO}_3$ ,  $\gamma\text{-Fe}_2\text{O}_3@\text{Ho}_2\text{O}_3$  and  $\gamma\text{-Fe}_2\text{O}_3@\text{HoVO}_4$  samples.

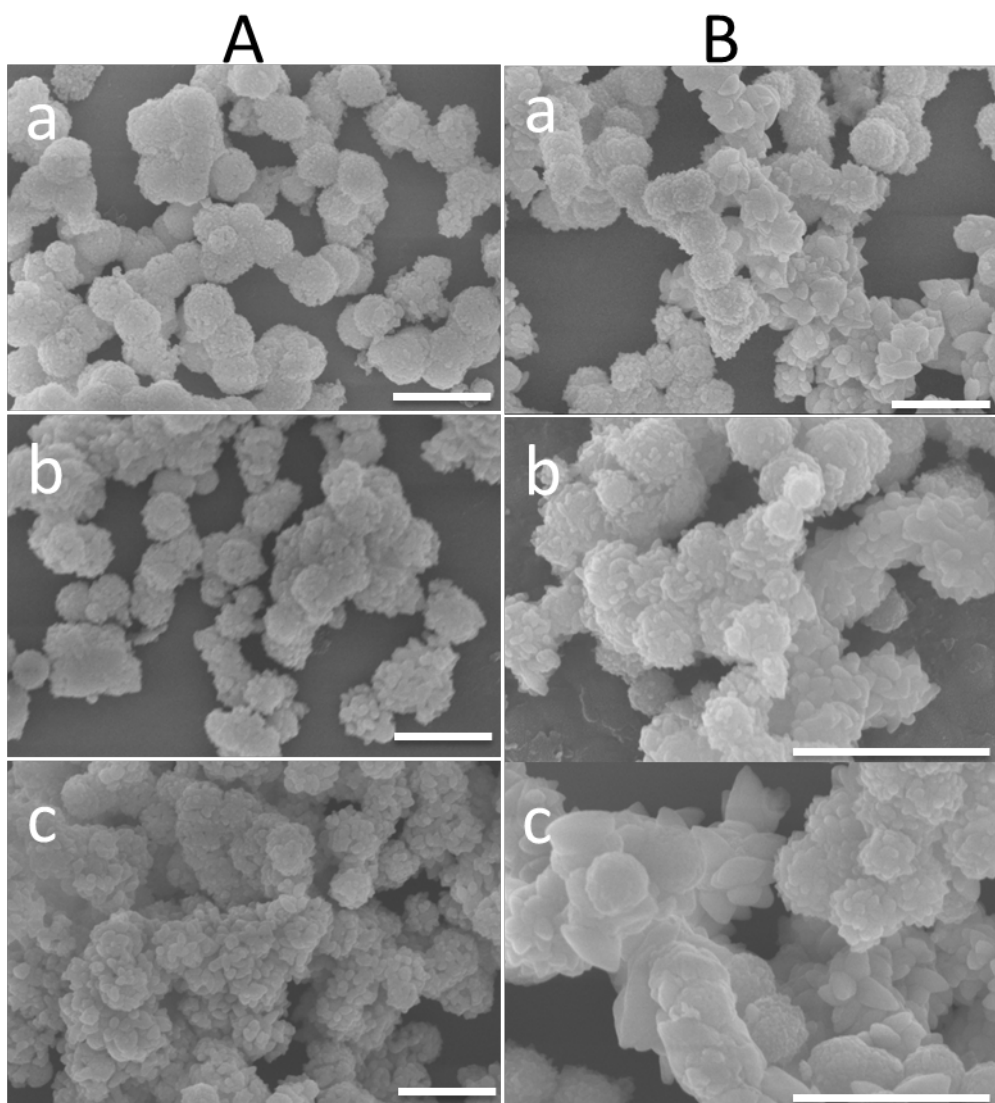

**Fig. S4** SEM images :  
Column A: a)  $\text{Fe}_3\text{O}_4@\text{SmVO}_4$ , b)  $\text{Fe}_3\text{O}_4@\text{DyVO}_4$ , and c)  $\text{Fe}_3\text{O}_4@\text{HoVO}_4$  microspheres synthesized using  $\text{Fe}_3\text{O}_4@\text{RE}(\text{OH})\text{CO}_3$  as precursors with stirring.  
Column B: a)  $\gamma\text{-Fe}_2\text{O}_3@\text{SmVO}_4$ , b)  $\gamma\text{-Fe}_2\text{O}_3@\text{DyVO}_4$ , and c)  $\gamma\text{-Fe}_2\text{O}_3@\text{HoVO}_4$  synthesized using the  $\gamma\text{-Fe}_2\text{O}_3@\text{RE}_2\text{O}_3$  microspheres as precursors without stirring.  
Scale bars: 1  $\mu\text{m}$

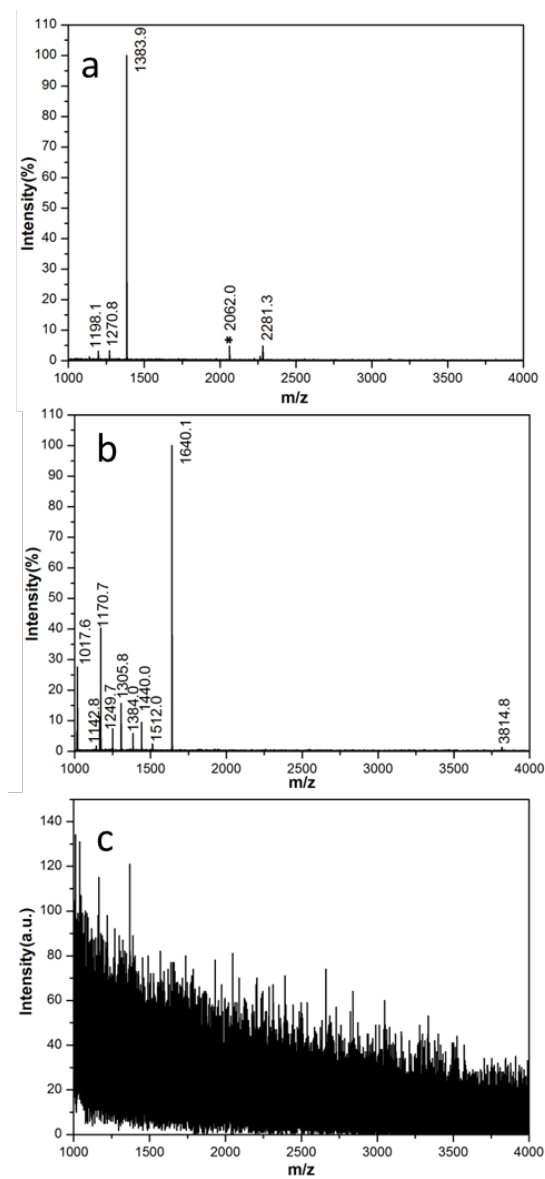

**Fig. S5** MALDI-TOF mass spectra of a)  $\beta$ -casein digest ( $1 \times 10^{-7}$  M), b) a digest mixture of  $\beta$ -casein and BSA (1:25, molar ratio) and c) a diluted human serum sample treated without the  $\gamma$ -Fe<sub>2</sub>O<sub>3</sub>@REVO<sub>4</sub> affinity microspheres.

5

10

15

20

25

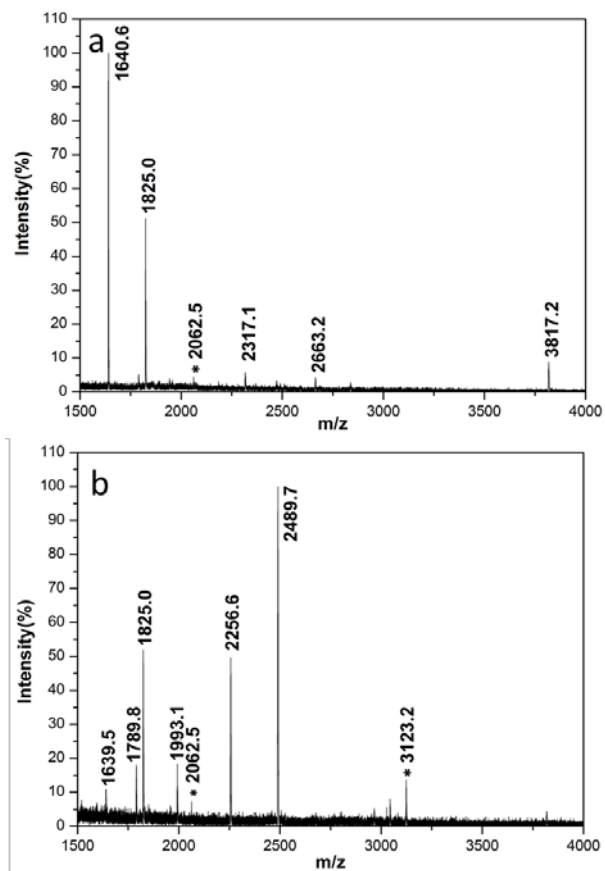

**Fig. S6** MALDI-TOF mass spectra of a digest mixture of  $\beta$ -casein and BSA (1:25, molar ratio) treated with a) as-synthesized  $\text{Fe}_3\text{O}_4$  and b)  $\text{TiO}_2$  nanoparticles, respectively.

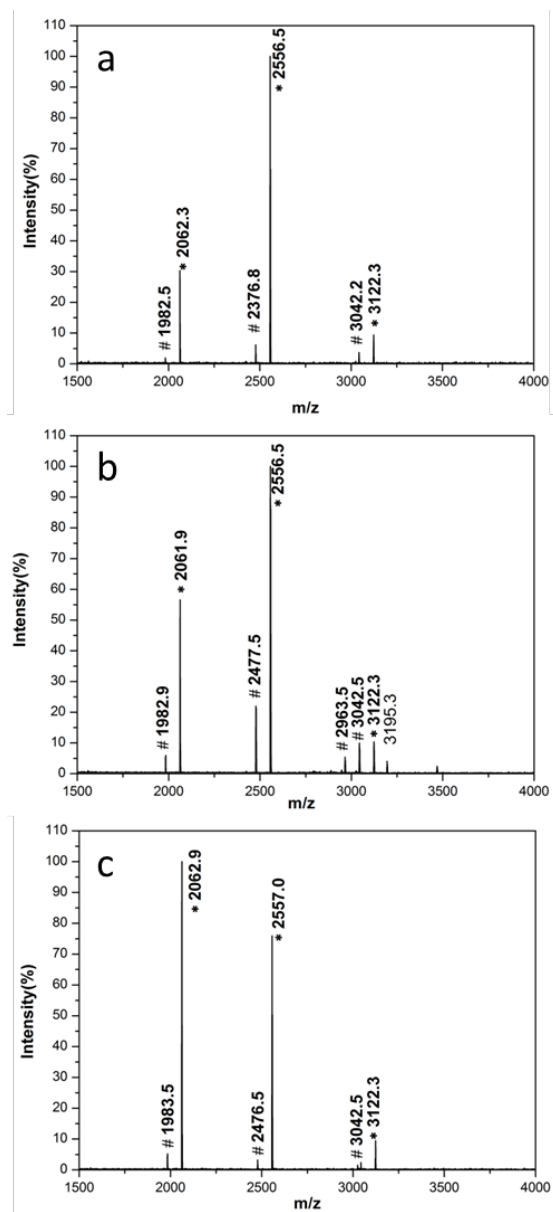

**Fig. S7** MALDI-TOF mass spectra of the peptides from  $\beta$ -casein digest ( $1 \times 10^{-7}$  M) treated with a)  $\gamma$ -Fe<sub>2</sub>O<sub>3</sub>@SmVO<sub>4</sub>, b)  $\gamma$ -Fe<sub>2</sub>O<sub>3</sub>@DyVO<sub>4</sub>, c)  $\gamma$ -Fe<sub>2</sub>O<sub>3</sub>@HoVO<sub>4</sub> microspheres respectively after these microspheres were recycled up to five times.

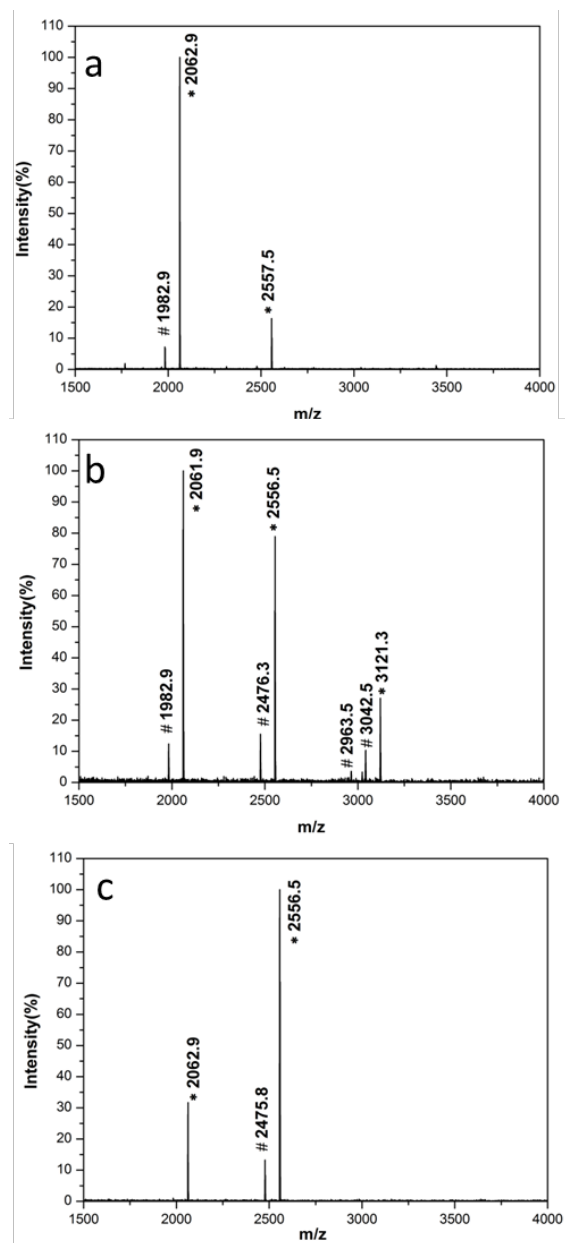

**Fig. S8** MALDI-TOF mass spectra of the peptides from  $\beta$ -casein digest ( $1 \times 10^{-7}$  M) treated with a)  $\gamma$ -Fe<sub>2</sub>O<sub>3</sub>@SmVO<sub>4</sub>, b)  $\gamma$ -Fe<sub>2</sub>O<sub>3</sub>@DyVO<sub>4</sub>, c)  $\gamma$ -Fe<sub>2</sub>O<sub>3</sub>@HoVO<sub>4</sub> microspheres respectively after these microspheres were recycled up to eight times.



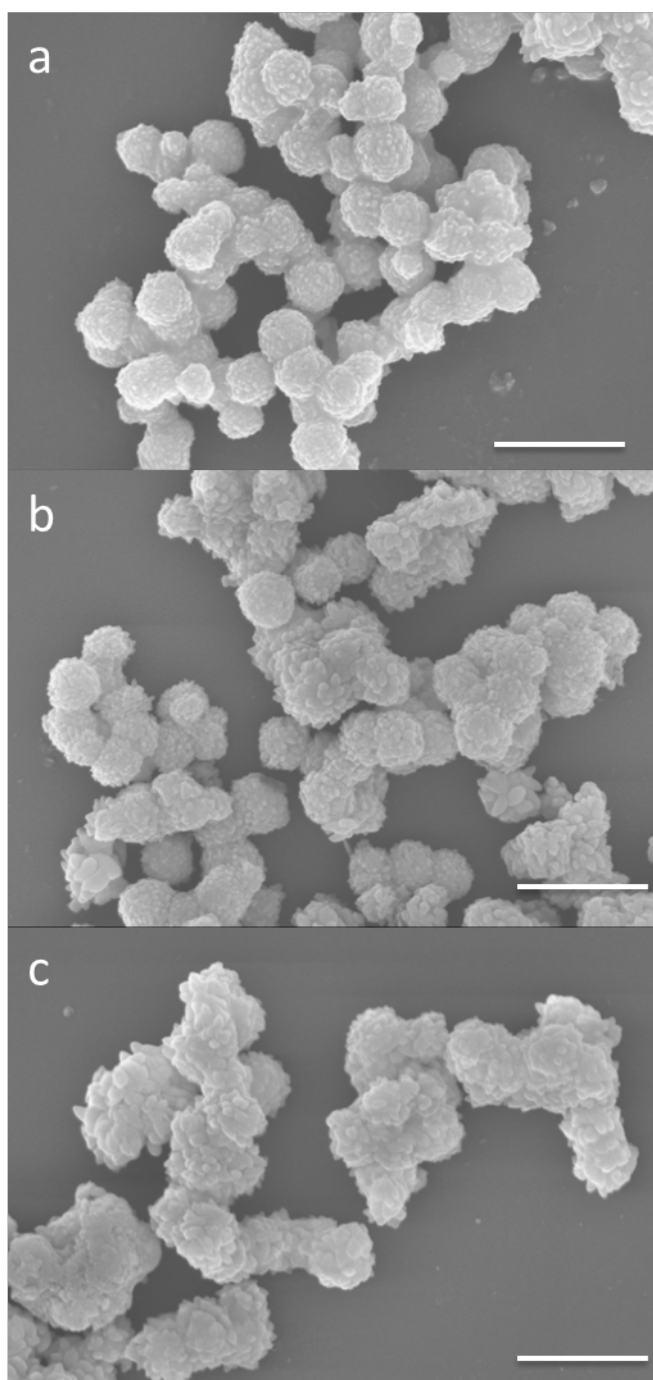

**Fig. S9** SEM images of a)  $\gamma\text{-Fe}_2\text{O}_3\text{@SmVO}_4$  b)  $\gamma\text{-Fe}_2\text{O}_3\text{@DyVO}_4$  c)  $\gamma\text{-Fe}_2\text{O}_3\text{@HoVO}_4$  after eight cycles using  $\beta$ -casein ( $1 \times 10^{-7}$ ) as analyte. Scale bar: 1  $\mu\text{m}$

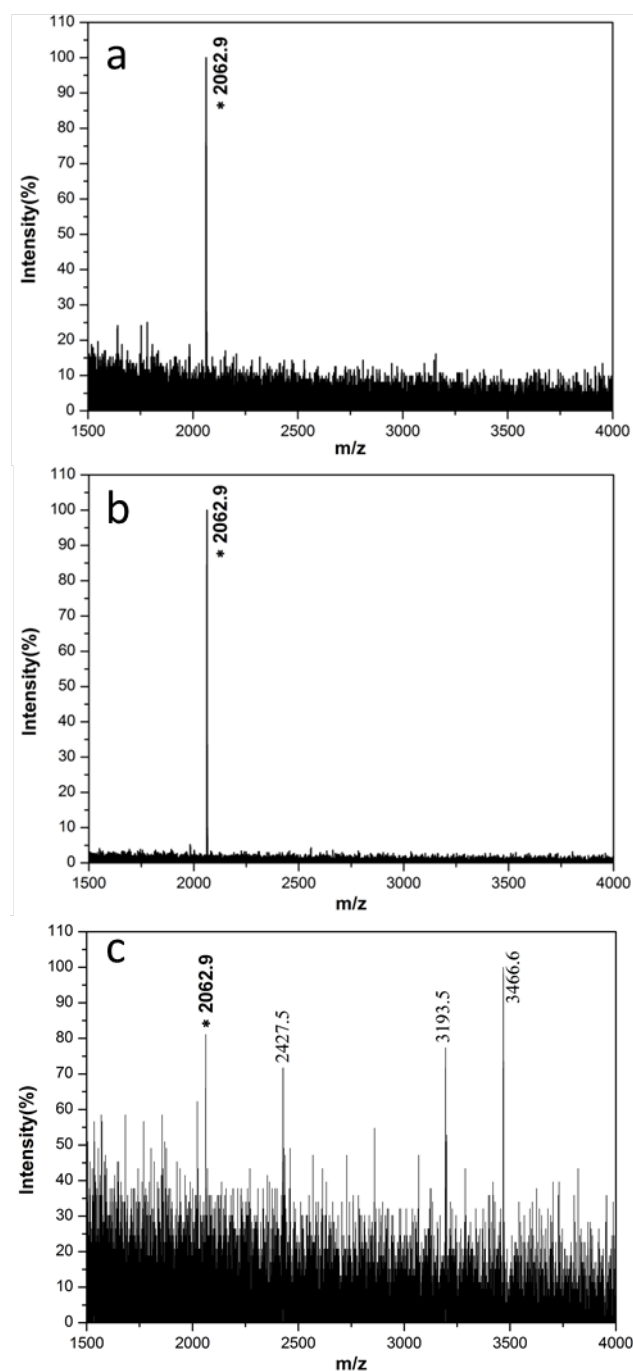

**Fig. S10** MALDI-TOF mass spectra of the highly diluted  $\beta$ -casein digest ( $1 \times 10^{-9}$ ) treated with a)  $\gamma$ -Fe<sub>2</sub>O<sub>3</sub>@SmVO<sub>4</sub>, b)  $\gamma$ -Fe<sub>2</sub>O<sub>3</sub>@DyVO<sub>4</sub>, respectively, and c) MALDI-TOF mass spectra of the highly diluted  $\beta$ -casein digest ( $2 \times 10^{-9}$ ) treated with  $\gamma$ -Fe<sub>2</sub>O<sub>3</sub>@HoVO<sub>4</sub> microspheres.

10

15

**Table S1.** The phosphopeptides and their label signals identified by MALDI-TOF MS from tryptic digest of  $\beta$ -casein.

| AA    | Peptide sequences                     | Observed<br><i>m/z</i> | Theoretical<br><i>m/z</i> | Phosphorylation site |
|-------|---------------------------------------|------------------------|---------------------------|----------------------|
| 33-48 | FQ[pS]EEQQQTEDELQDK                   | 2061.3                 | 2061.8                    | 1                    |
| 33-52 | FQ[pS]EEQQQTEDELQDKIHPP               | 2555.5                 | 2556.0                    | 1                    |
| 1-25  | RELEELNVPGEIVE[pS]L[pS][pS][pS]EESITR | 3121.6                 | 3122.2                    | 4                    |

**Table S2.** Detailed Information of the Observed Endogenous Phosphopeptides from Human serum

| NO. | Peptide sequences   | Observed<br><i>m/z</i> | Theoretical<br><i>m/z</i> | Phosphorylation site |
|-----|---------------------|------------------------|---------------------------|----------------------|
| 1   | D[pS]GEGDFLAEGGGVR  | 1545.8                 | 1545.5                    | 1                    |
| 2   | AD[pS]GEGDFLAEGGGVR | 1616.9                 | 1616.7                    | 1                    |
